# Supplementary material for: Understanding Different Types of Recreational Runners and How They Use Running-Related Technology
Source: MDPI journal article supplement (doi:10.3390/ijerph17072276), 2020-03-27
Supplement: s1 [file s1]

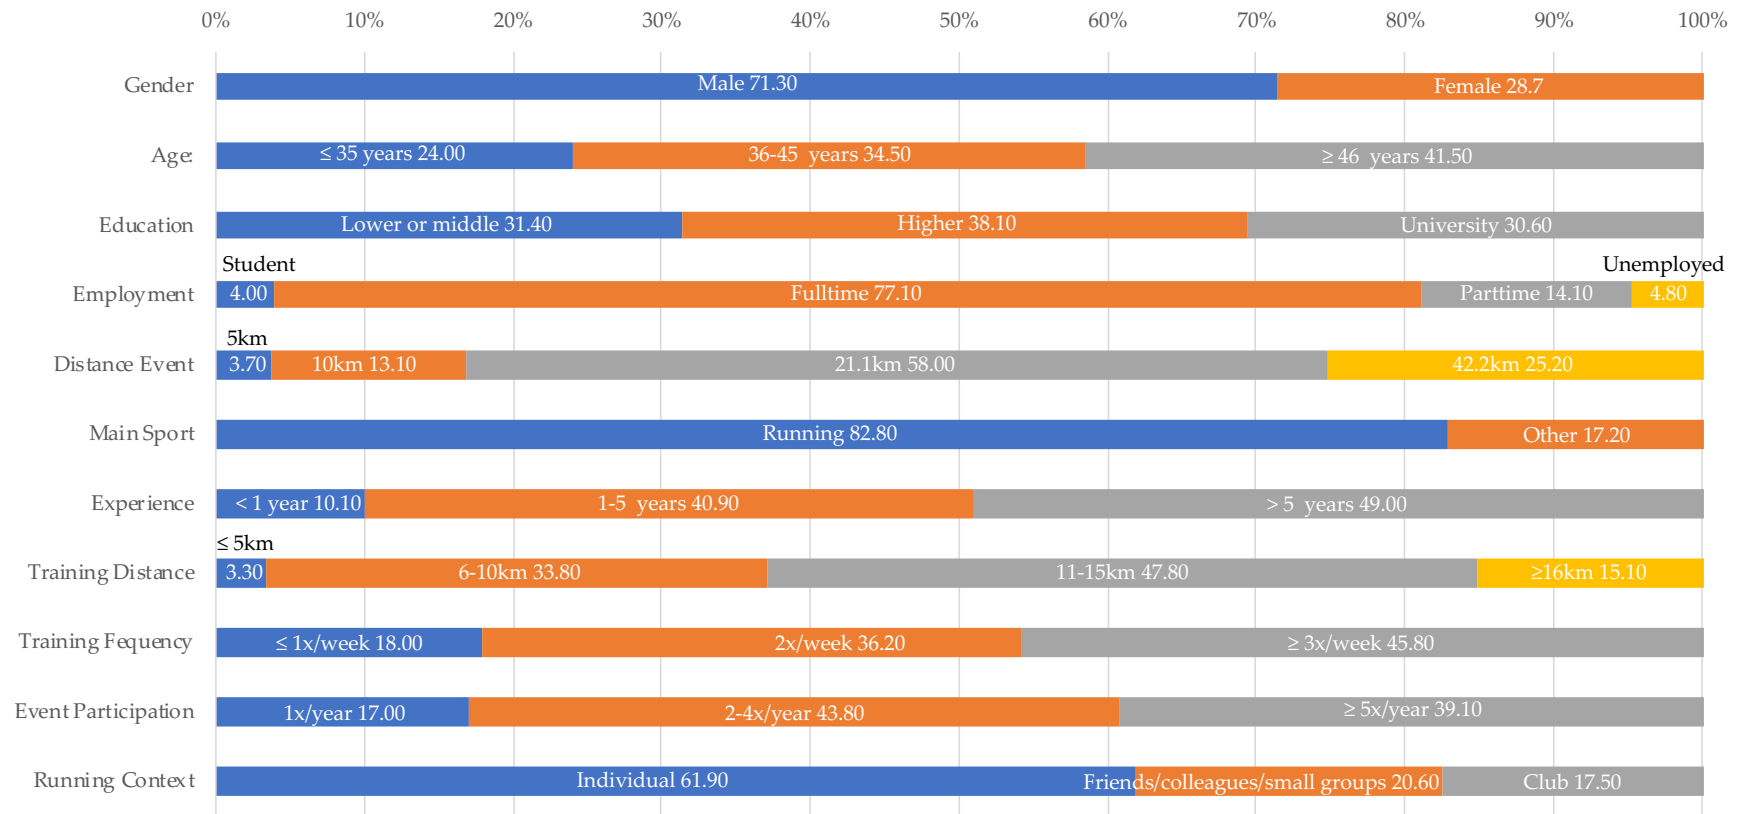

Figure S2. Summary of independent variables for Individual Competitive Runners in percentages (N = 1012).
