# Supplementary material for: Understanding Different Types of Recreational Runners and How They Use Running-Related Technology
Source: MDPI journal article supplement (doi:10.3390/ijerph17072276), 2020-03-27
Supplement: s1 [file s1]

# Questionnaire ERS2016

## SECTION 1 AIOs running

Please respond to the following statements by checking the box that best reflects your opinion on each of the following items.

|                                                                                                              | Strongly<br>disagree.    | Disagree.                | Neutral.                 | Agree                    | Strongly<br>agree        |
|--------------------------------------------------------------------------------------------------------------|--------------------------|--------------------------|--------------------------|--------------------------|--------------------------|
| The possibility to run on your own is an important reason to be involved in running <sup>4</sup>             | <input type="checkbox"/> |
| The possibility to run at any time is an important reason to be involved in running <sup>4</sup>             | <input type="checkbox"/> |
| The possibility to run in your own environment is an important reason to be involved in running <sup>4</sup> | <input type="checkbox"/> |
| Running is a social sport <sup>3</sup>                                                                       | <input type="checkbox"/> |
| Running is appealing for both men and women                                                                  | <input type="checkbox"/> |
| Running is a competitive sport <sup>6</sup>                                                                  | <input type="checkbox"/> |
| Running is appealing for both youngsters and the elderly                                                     | <input type="checkbox"/> |
| Running is an exciting sport <sup>3</sup>                                                                    | <input type="checkbox"/> |
| Running is for those who persevere                                                                           | <input type="checkbox"/> |
| Running is easy to fit into daily life                                                                       | <input type="checkbox"/> |
| Running is good for your condition <sup>1</sup>                                                              | <input type="checkbox"/> |
| Running is good for your health <sup>1</sup>                                                                 | <input type="checkbox"/> |
| Running is an individual sport                                                                               | <input type="checkbox"/> |
| Running gives you energy <sup>1</sup>                                                                        | <input type="checkbox"/> |
| Running is good for your mental recovery <sup>1</sup>                                                        | <input type="checkbox"/> |
| I am proud to be a runner <sup>3</sup>                                                                       | <input type="checkbox"/> |
| I feel connected with other runners <sup>3</sup>                                                             | <input type="checkbox"/> |
| Running is a performance sport <sup>6</sup>                                                                  | <input type="checkbox"/> |
| I consider myself to be a real runner <sup>3</sup>                                                           | <input type="checkbox"/> |

To which extent do you agree that the following items are a reason for you to quit running? Please respond by checking the box that best reflects your opinion.

|                                                | Strongly<br>disagree.    | Disagree.                | Neutral.                 | Agree                    | Strongly<br>agree        |
|------------------------------------------------|--------------------------|--------------------------|--------------------------|--------------------------|--------------------------|
| My running partners quit running <sup>2</sup>  | <input type="checkbox"/> |
| My running group falls apart <sup>2</sup>      | <input type="checkbox"/> |
| My trainer / coach is leaving <sup>2</sup>     | <input type="checkbox"/> |
| Increasing financial costs involved in running | <input type="checkbox"/> |
| Preference for another sport <sup>5</sup>      | <input type="checkbox"/> |
| Reduction of leisure time <sup>5</sup>         | <input type="checkbox"/> |
| Tired of running <sup>5</sup>                  | <input type="checkbox"/> |
| Physical constraints or injuries <sup>5</sup>  | <input type="checkbox"/> |

Continue to SECTION 2

## SECTION 2 technology use

Did you use a monitoring device, sports watch or smartphone application during running in the last 12 months?

☐

Yes, I used a sports watch

(go to SECTION 2 sport watch)

☐

Yes, I used a smartphone application

(go to SECTION 2 app)

☐

No, I did not use any sports watch or smartphone application

(go to SECTION 2 no use)

## SECTION 2 sports watch

You stated to use a sports watch during running in the last 12 months.

Which parameters do you monitor with your sports watch? (multiple answers possible)

- ☐ Distance
- ☐ Time
- ☐ Speed
- ☐ Heart rate
- ☐ Other, please specify

What do you do with the data collected from your watch? (multiple answers possible)

- ☐ Nothing
- ☐ I use the data to review my session after the run
- ☐ I use this data to monitor my progress overtime
- ☐ I use this data to adapt my training / running schedule

Continue to SECTION 3

## SECTION 2 app

You stated to use a smartphone application (app) during running in the last 12 months.

Which parameters do you monitor with your app? (multiple answers possible)

- ☐ Distance
- ☐ Time
- ☐ Speed
- ☐ Heart rate
- ☐ Other, please specify

What do you do with the data collected from your app? (multiple answers possible)

- ☐ Nothing
- ☐ I use the data to review my session after the run
- ☐ I use this data to monitor my progress overtime
- ☐ I use this data to adapt my training / running schedule

Continue to SECTION 3

## SECTION 2 no use

You stated not to use any sports watch or smartphone application during running. Why not? (multiple answers possible)

- ☐ Running with a smartphone/watch is ignorant
- ☐ It has no added value
- ☐ There is no need for me to use it
- ☐ It doesn't fit with my running experience

Continue to SECTION 3

### SECTION 3 Running habits and Socio-demographics

Which distance did you run during the event?

- ☐ 5km
- ☐ 10km
- ☐ Half Marathon
- ☐ Marathon

Is running your main sport?

- ☐ No
- ☐ Yes

When did you start running?

- ☐ less than 1 year ago
- ☐ 1 to 3 years ago
- ☐ 4 to 5 years ago
- ☐ More than 5 years ago

On average, how many kilometers per training session do you run?

- ☐ 0-5 km
- ☐ 6-10 km
- ☐ 11-15 km
- ☐ 16 or more km

How often do you run?

- ☐ Once a week or less
- ☐ 2 times a week
- ☐ 3 times a week or more

How often did you participate in running events in the last 12 months?

- ☐ This event was my only running event
- ☐ 2-4 times a year
- ☐ 5 or more times a year

In which setting do you normally run? (choose the best fit)

- ☐ Mainly or solely on my own
- ☐ Mainly or solely with friends, colleagues, small groups
- ☐ Mainly or solely with a running club

What is your age?

What is your gender?

- ☐ Male
- ☐ Female

What is your employment status? Are you currently?

- ☐ A student
- ☐ Full-time employed
- ☐ Part-time employed
- ☐ Not employed

What is the highest degree or level of school you have completed?

- ☐ Lower or middle education
- ☐ Higher education
- ☐ University
