# Supplementary figures and images for: Understanding Different Types of Recreational Runners and How They Use Running-Related Technology
Source: MDPI journal article supplement (doi:10.3390/ijerph17072276), 2020-03-27

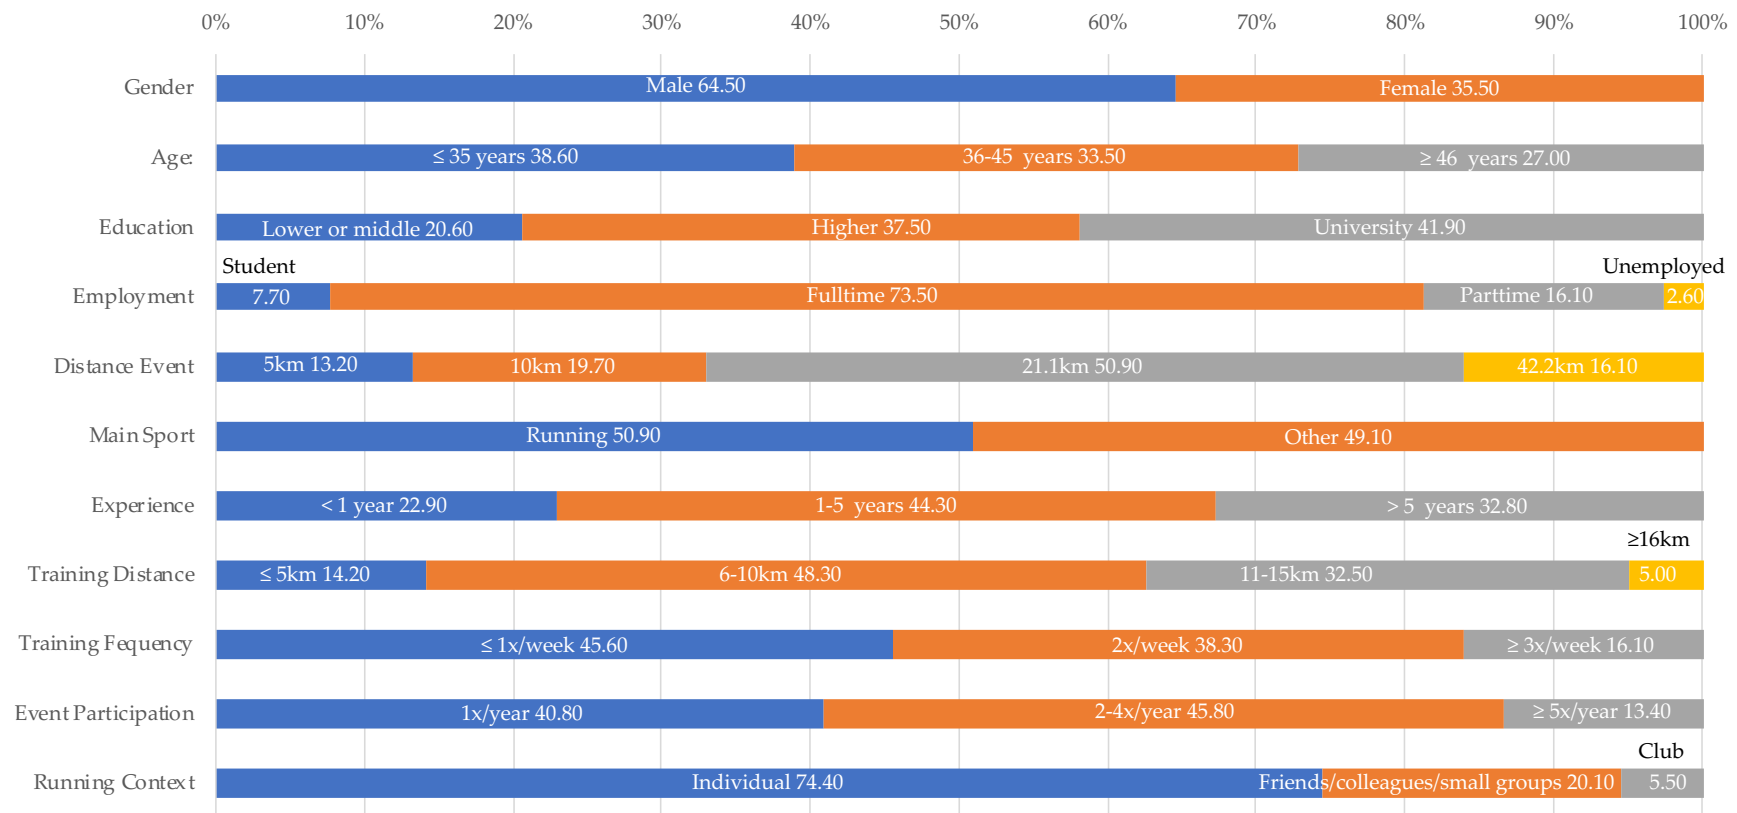

Figure S3. Summary of independent variables for Casual Individual Runners in percentages (N = 886).

Supplement: s1 [file s1]

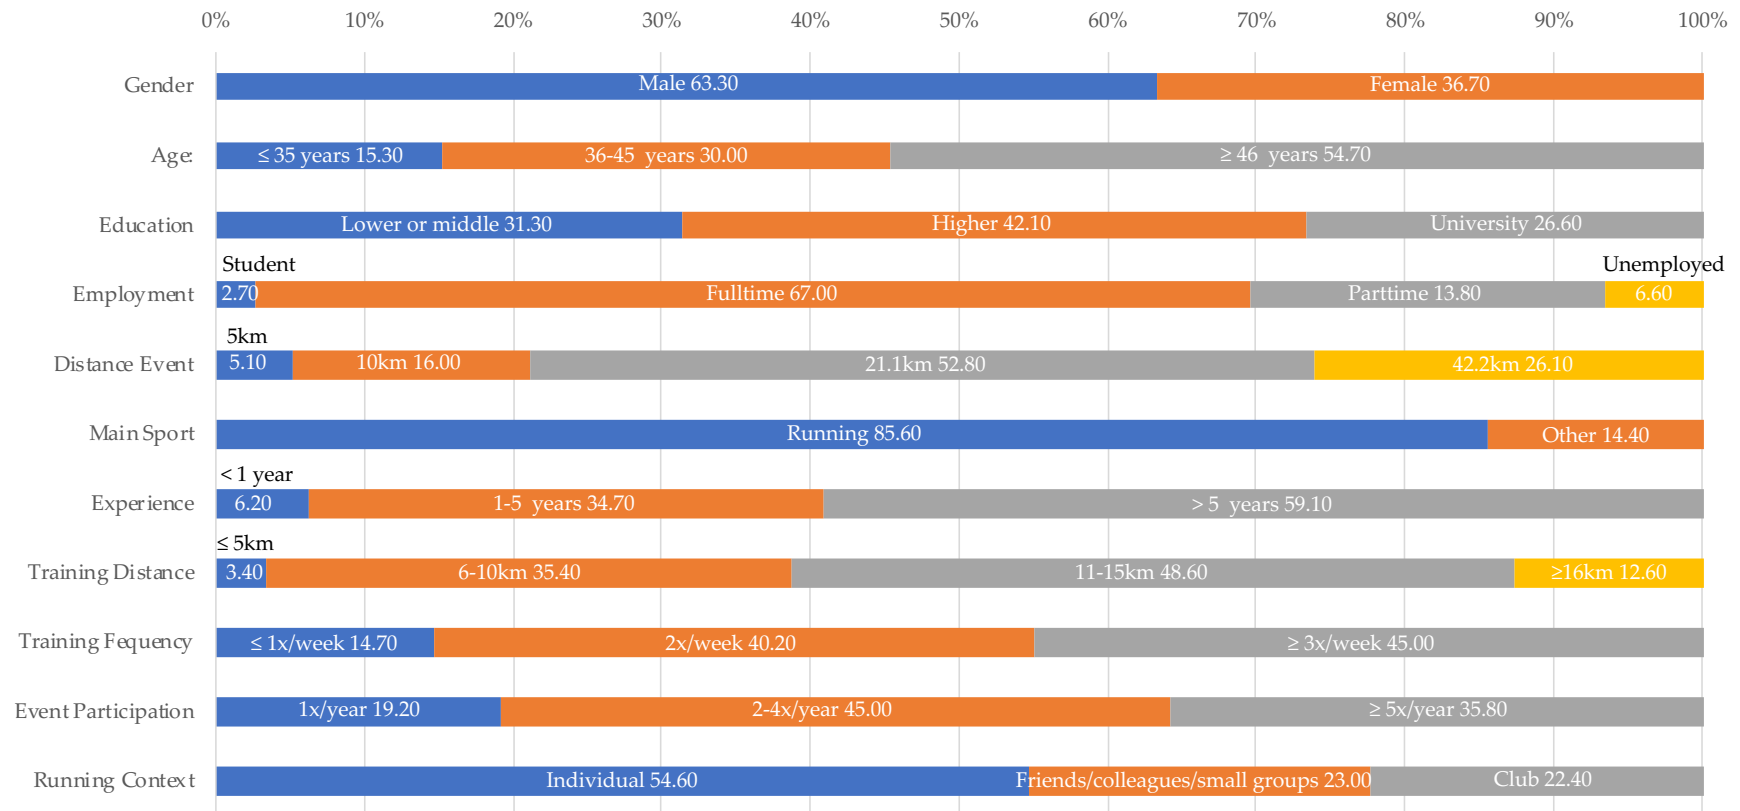

Figure S5. Summary of independent variables for Devoted Runners in percentages (N = 821).

Supplement: s1 [file s1]

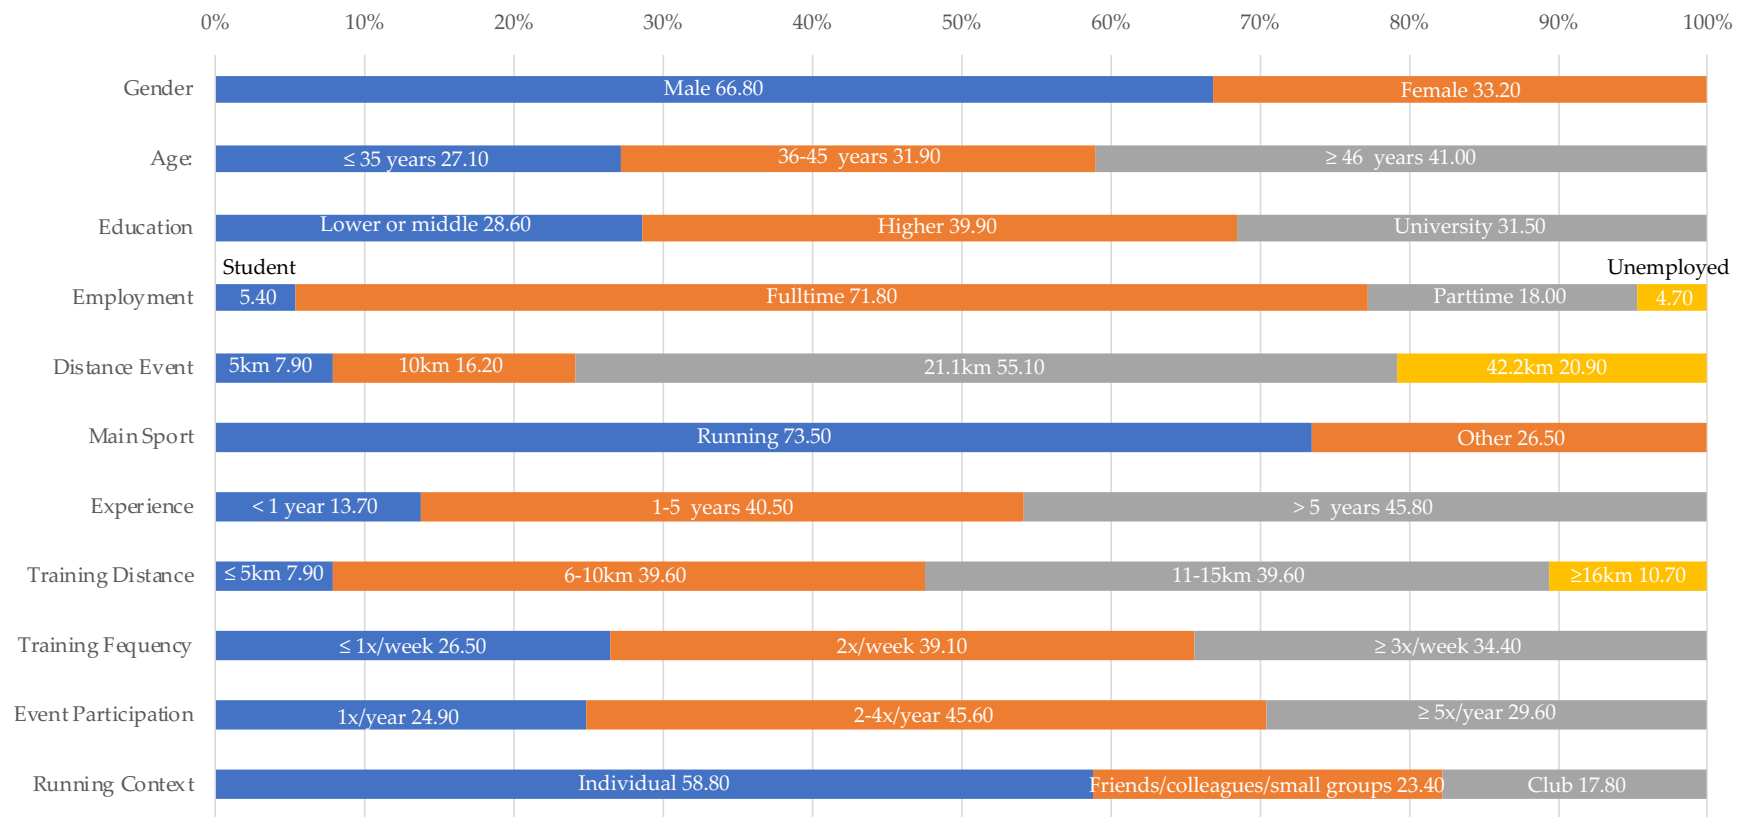

Figure S1. Summary of independent variables for all runners in percentages (N = 3727).

Supplement: s1 [file s1]

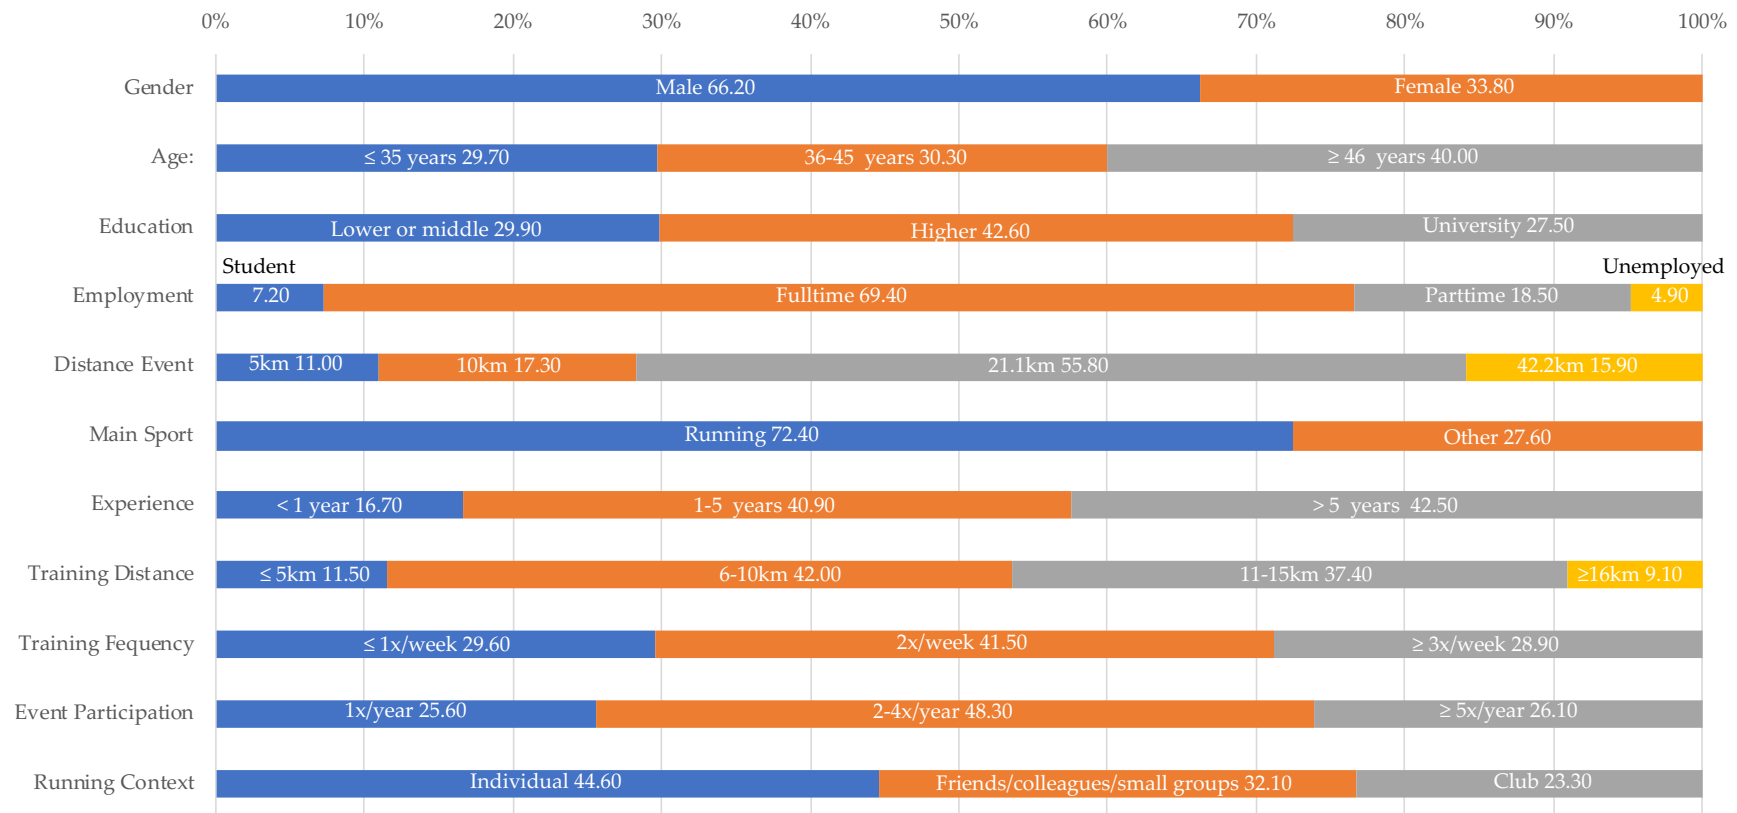

Figure S4. Summary of independent variables for Social Competitive Runners in percentages (N = 1008).

Supplement: s1 [file s1]
